# Supplementary material
Source: PubMed Central journal article supplement (PMC2822037)
Supplement: NIHMS159992-supplement-Supp_Info.pdf [file NIHMS159992-supplement-Supp_Info.pdf]

# Supplementary Information

for: “PRIMO/PRIMONA: A coarse-grained model for proteins and nucleic acids that preserves near-atomistic accuracy”

Srinivasa M. Gopal, Shayantani Mukherjee, Yi-Ming Cheng, Michael Feig

## Construction of local coordinate system for scheme 1

In scheme 1, an atomic site A ( $\vec{r}_A$ ) is constructed based on the distance A-B ( $b$ ), the angle A-B-C ( $\theta$ ), and the dihedral A-B-C-D ( $\phi$ ). Let  $\vec{r}_B$ ,  $\vec{r}_C$ ,  $\vec{r}_D$  be the position vectors of known atoms B, C and D respectively. Using the above information, the position of Atom in a local coordinate system ( $\vec{r}_A^l$ ) can be represented in a local coordinate system (where  $b$  is the radius,  $\theta$  is the polar angle and  $\phi$  is the azimuthal angle) by the spherical coordinate transformation as

$$\vec{r}_A^l = \begin{bmatrix} b \sin(\theta) \sin(\phi) \\ b \sin(\theta) \cos(\phi) \\ b \cos(\theta) \end{bmatrix} \quad (1)$$

The local coordinate system is constructed as follows. First the local z-axis ( $\hat{w}$ ) is defined as

$$\hat{w} = \frac{\vec{r}_C - \vec{r}_B}{|\vec{r}_C - \vec{r}_B|} \quad (2)$$

Local X-axis ( $\hat{u}$ ) is defined as the unit normal to plane defined by  $\hat{w}$ ,  $\vec{r}_B$  and  $\vec{r}_D$  vectors as

$$\hat{u} = \frac{\vec{r}_{BD} \times \hat{w}}{|\vec{r}_{BD} \times \hat{w}|} \quad (3)$$

Since X and Z axis are defined, there is a unique Y-axis which is

$$\hat{v} = \hat{w} \times \hat{u} \quad (4)$$

The transformation<sup>1,2</sup> ( $\mathbf{T}$ ) which maps atoms B, C and D to a local coordinate system such that where B is placed at origin, C on Z-axis and D in Y-Z plane is given by

$$\mathbf{T} = \begin{bmatrix} u^x & v^x & w^x & 0 \\ u^y & v^y & w^y & 0 \\ u^z & v^z & w^z & 0 \\ -\hat{u} \cdot \hat{r}_B & -\hat{v} \cdot \hat{r}_B & -\hat{w} \cdot \hat{r}_B & 1 \end{bmatrix} \quad (5)$$

We need the inverse of above transformation ( $\mathbf{I}$ ) to express local position of atom A  $\vec{r}_A^l$  in terms of global coordinates.

$$\mathbf{I} = \begin{bmatrix} u^x & u^y & u^z & 0 \\ v^x & v^y & v^z & 0 \\ w^x & w^y & w^z & 0 \\ r_B^x & r_B^y & r_B^z & 1 \end{bmatrix} \quad (6)$$
$$\vec{r}_A = \mathbf{I} \cdot \vec{r}_A^l$$

## Comparison of reconstruction methods for villin decoy set

| Residue/Type                   | RMSD ( $\sigma_{\text{RMSD}}$ ) in Å |              |               |              |              |
|--------------------------------|--------------------------------------|--------------|---------------|--------------|--------------|
|                                | PRIMO                                | SICHO/CA     | SICHO         | BB           | CA           |
| All                            | 0.083 (0.01)                         | 1.183 (0.11) | 1.498 (0.10)  | 1.503 (0.20) | 1.978 (0.18) |
| Back                           | 0.064 (0.02)                         | 0.753 (0.07) | 1.191 (0.13)  | 0.000 (0)    | 0.647 (0.10) |
| Side                           | 0.095 (0.02)                         | 1.480 (0.16) | 1.739 (0.13)  | 2.104 (0.28) | 2.695 (0.25) |
| C <sub>α</sub>                 | 0 (0)                                | 0 (0)        | 0.863 (0.13)  | 0.000 (0)    | 0.000 (0)    |
| C <sub>α</sub> +C <sub>β</sub> | 0.065 (0.01)                         | 0.501(0.05)  | 1.060 (0.11)  | 0.047 (0.01) | 0.403 (0.09) |
| Arg                            | 0.047 (0.02)                         | 1.086 (0.39) | 1.345 (0.41)  | 2.853 (1.82) | 3.671 (1.82) |
| Asn                            | 0.007 (0.00)                         | 1.013 (0.37) | 1.414 (0.32)  | 2.032 (0.74) | 2.383 (0.52) |
| Asp                            | 0.012 (0.00)                         | 0.735 (0.23) | 1.103 (0.34)  | 1.945 (0.64) | 2.123 (0.43) |
| Gln                            | 0.056 (0.02)                         | 0.975 (0.29) | 1.301 (0.28)  | 2.277 (0.77) | 2.245 (0.78) |
| Glu                            | 0.055 (0.02)                         | 0.742 (0.21) | 1.265 (0.280) | 2.021 (0.70) | 2.280 (0.69) |
| Leu                            | 0.139 (0.06)                         | 0.888 (0.26) | 1.345 (0.23)  | 1.093 (0.35) | 1.512 (0.44) |
| Lys                            | 0.045 (0.01)                         | 0.848 (0.20) | 1.356 (0.22)  | 2.255 (0.53) | 2.477 (0.53) |
| Met                            | 0.051 (0.01)                         | 2.405 (0.70) | 2.259 (0.51)  | 1.875 (0.68) | 2.891 (1.10) |
| Phe                            | 0.097 (0.02)                         | 2.581 (0.46) | 2.683 (0.34)  | 1.470 (1.02) | 3.267 (0.81) |
| Pro                            | 0.144 (0.08)                         | 0.264 (0.19) | 0.914 (0.43)  | 0.297 (0.30) | 0.460 (0.31) |
| Ser                            | 0.094 (0.01)                         | 0.295 (0.20) | 0.945 (0.29)  | 1.025 (0.46) | 1.267 (0.39) |
| Thr                            | 0.124 (0.02)                         | 0.894 (0.55) | 1.297 (0.51)  | 0.520 (0.57) | 1.279 (0.68) |
| Trp                            | 0.105 (0.01)                         | 0.704 (0.59) | 1.510 (0.87)  | 3.259 (1.60) | 3.627 (1.76) |
| Val                            | 0.251 (0.14)                         | 0.557 (0.38) | 1.007 (0.45)  | 0.313 (0.41) | 0.812 (0.53) |

## References

1. Newman, W. M.; Sproul, R. F. Principles of Interactive Computer Graphics; McGraw-Hill: New York, 1979.
2. Bower, M. J.; Cohen, F. E.; Dunbrack, R. L. Journal of Molecular Biology 1997, 267(5), 1268-1282.
